# Supplementary material for: Effect of Gamification With and Without Financial Incentives to Increase Physical Activity Among Veterans Classified as Having Obesity or Overweight: A Randomized Clinical Trial
Source: PubMed Central journal article supplement (PMC8271358; doi:10.1001/jamanetworkopen.2021.16256), 2021-07-09
Supplement: jamanetwopen-e2116256-s001.pdf [file jamanetwopen-e2116256-s001.pdf]

6 **SUPPLEMENT 1**

7 **Social Incentive-Based Gamification with and without Financial**  
8 **Incentives to Increase Physical Activity Among Overweight and**  
9 **Obese Veterans**

10  
11 Study Protocol

12  
13 September 1, 2017

14  
15  
16  
17  
18  
19  
20  
21  
22  
23  
24  
25  
26  
27  
28  
29  
30  
31  
32  
33  
34  
35  
36  
37  
38  
39  
40  
41  
42  
43  
44

45 **Section 1. General Information**

46  
47 **Protocol Title:** A Randomized Trial of Social and Financial Incentives to Increase Physical Activity Among  
48 Overweight and Obese Veterans

49 **CMCVAMC Protocol Version Number and Date:** Version 5, October 25, 2019

50  
51 **Principal Investigator (PI) Name:** Mitesh Patel, MD, MBA, MS

52  
53 **PI's Academic Degree(s):**

54  
55 **Is the study funded?**  **If "yes", specify funding agency:**

56  
57 **Is a grant application requesting funds for the study currently being reviewed?**  **NO**

58  
59 **CMCVAMC is the only institution involved:**  **YES**

60  
61 **CMCVAMC is the coordinating center in which the PI is the lead investigator:**  **NO**

62 **If this answer is yes, complete the next two sections:**

63     > **List the name(s) of the other site(s) involved.**

64     > **Provide the FederalWide Assurance (FWA) numbers for each site.**

65  
66 **State name of coordinating center if this is not CMCVAMC.**

67  
68 **Describe PI's qualifications to conduct this project, and attach a copy of PI's VA or NIH biosketch. Be**  
69 **specific in regard to PI's research experience.** Mitesh Patel, MD, MBA, MS is the Principal Investigator (PI)  
70 and is Core Investigator at the VA Center for Health Equity Research and Promotion (CHERP) and a staff  
71 physician at the CMCVAMC in Philadelphia. He is also an Assistant Professor of Medicine and Health Care  
72 Management at the Perelman School of Medicine and the Wharton School at the University of Pennsylvania. He  
73 has led more than 15 randomized clinical trials including many physical activity behavioral interventions that use  
74 the Way to Health research information technology platform. He has experience and training in behavioral  
75 economics, clinical trial design and analysis, health services research, and statistical analysis. He currently spends  
76 80% of his effort on research and 20% on clinical and teaching activities.

77 **Does any research staff member have an actual and/or perceived conflict of interest with this study?**  **NO**

78 If yes, explain.

79  
80 **Is this study a clinical trial?**  **If yes, specify the type.**

81  
82 **State the estimated length of time to complete enrollment of subjects.**

83  
84 **State the expected duration of participation by individual subjects (including any follow-up, e.g., need to re-**  
85 **contact subject for follow-up questions prior to closure of the study).**

86  
87 **Specify the projected date of completion of the study.**

88  
89  
90  
91 **Section 2: Participating Site Specifications**

92 **2.1. Where will the research project be conducted? (Check all that apply)**

93      **VA Inpatient Setting**

**VA Outpatient Clinic/Office**

94      **VA Laboratories**

**Subject Homes**

95  
96  
97  
98  
99  
100  
101  
102  
103  
104  
105  
106  
107  
108  
109  
110  
111  
112  
113  
114  
115  
116  
117  
118  
119  
120  
121  
122  
123  
124  
125  
126  
127  
128  
129  
130  
131  
132  
133  
134  
135  
136  
137  
138  
139  
140  
141  
142  
143

University of Pennsylvania

Community Based Outpatient Clinics (CBOCs)

Other (Specify):

2.2. **If research is conducted at a non-VA site, please specify where and how much of the project will be conducted at that location.** This project will remotely track veterans’ physical activity with the use of a wearable device, either a Fitbit Alta or Fitbit Inspire.

**Section 3: Introduction**

3.1. **Provide scientific background and rationale for study. Including summary of gaps in current knowledge, relevant data, and how the study will add to existing knowledge.** Over 80% of veterans have at least two risk factors for cardiovascular disease (CVD). Regular physical activity is associated with reduced risk for CVD, but less than half of veterans achieve enough physical activity to obtain these benefits. Digital health approaches that use engagement strategies such as gamification are commonly found within workplace wellness programs and mobile applications, but the evidence is limited. In 2015, the Veterans Affairs Evidence-Based Program published a systematic review which found only 14 trials on the use of wearable device technology with none that enrolled veterans for the purpose of testing how these devices could augment physical activity. Our prior work has demonstrated that wearables may be appropriate for monitoring health behaviors, but they alone they do not drive behavior change.

Social incentives or those influences that impact individuals to adjust their behaviors based on social ties and connections have been demonstrated in retrospective studies to influence behavior but have not been well examined prospectively. Insights from behavioral economics can be used to design gamification interventions to enhance social incentives such as the support, competition, or collaboration but the optimal design to increase physical activity is unknown. This study will use behavioral economics frameworks to design and test a social incentive-based gamification intervention with and without financial incentives to increase physical activity among overweight and obese veterans. We will test whether this intervention can be conducted remotely, thereby reducing participant burden of coming in for an in-person visit and creating a more scalable intervention design. Specifically, we will test the ability of using wearable devices with social and financial incentive-based interventions to augment physical activity as measured by change in mean daily step counts which will be tracked by a wearable activity tracker.

**Section 4: Objectives Section**

4.1. **Describe the study’s purpose, specific aims, or objectives.**  
The objective of this study is to use a randomized, controlled trial to test the effectiveness using a remotely-monitored social incentive-based gamification intervention with and without financial incentives to increase physical activity among overweight and obese veterans. All participants will use wearable devices to establish a baseline step count and monitor their physical activity during the study.

*Primary outcome:* The primary outcome is change in mean daily steps from baseline to the weeks 5 to 12 of the intervention period (which excludes the 4-week ramp-up phase).

*Secondary outcomes:* Secondary outcomes include change in mean daily steps from baseline to the 8-week follow-up period, Proportion of participant-days achieving step goals during the intervention and follow-up periods.

*Exploratory outcomes:* We will explore how participant characteristics and behaviors are associated with strong or poor physical activity performance.

4.2. **State the hypotheses to be tested.**

144 Hypothesis: The combination of social and financial incentives will lead to greatest increase in mean step  
145 counts from baseline.  
146

## 147 **Section 5: Study Procedures**

### 148 5.1. **Study Design**

#### 149 5.1.1. **Describe in detail the experimental design, i.e. from recruitment procedures to** 150 **study closure.**

151 *Design:* This is a three-arm randomized, controlled trial with a 12-week intervention period and 8-week  
152 follow-up period. The study will be conducted using Way to Health (WTH), a research information  
153 technology platform at the University of Pennsylvania that has been used previously at the CMCVAMC for  
154 a behavioral study.

155 *Study duration:* This study is anticipated to take up to 2 years to complete and includes a 12-week  
156 intervention period and 8-week follow-up period.

157 *Target population:* Veterans, age 18 years or older, who received care at the CMCVAMC and have a body  
158 mass index of 25 or greater.

159 *Accrual:* This study has been powered for two phases of hypothesis testing. In the first phase, we will  
160 compare each of the two intervention arms to control. We estimate that a sample of 180 participants  
161 allocated in a 1:1:1 distribution, will ensure at least 80% power to detect a 900-step difference between  
162 each intervention arm and control, with a standard deviation of 1500 steps. This calculation assumes a 10%  
163 missing data rate and a conservative Bonferroni adjustment of the type I error rate with a 2-sided alpha of  
164 0.025. In the second phase, we will compare successful intervention arms to each other. We expect that the  
165 magnitude of difference between intervention arms will be less than that of successful intervention arms  
166 compared to control. For this second phase of analyses will use a conservative Bonferroni adjustment of the  
167 type I error rate with a 2-sided alpha of 0.017 to adjust for up to 3 comparisons. In 2012, more than 57,500  
168 veterans enrolled for care at CMCVAMC and comprised nearly 463,000 visits. Since 70% of veterans are  
169 overweight or obese, nearly 40,000 veterans may be eligible for this study. Based on this data and prior  
170 studies, we estimate that we can fill the study within 6 months. We will plan to oversample women and  
171 minorities in the recruitment process.

#### 172 *Interventions:*

173 In order to minimize cost, time and travel for Veterans and to make study the least burdensome as possible,  
174 recruitment and enrollment will be completed remotely. Veterans will be asked to verify their identity using  
175 their name and age. Participants will be enrolled remotely using a standardized eligibility survey which will  
176 be conducted over the phone. Once deemed eligible and oral consent is obtained, participants will be asked  
177 to complete a telephone survey to obtain demographic data, activity data and information on use of  
178 technology. Participants will be told to wear the activity tracking device during day and night to get  
179 accustomed to it during a 2-week run-in period. Data collected from this time will be used to estimate a  
180 baseline step count using methods from prior work by using data from the second week (days 8 to 14),  
181 ignoring values less than 1000 steps (since evidence suggests these values are unlikely to represent actual  
182 activity). Participants without at least 4 days of data will be called to inquire if there are any issues with  
183 using the device and the period will be extended until at least 4 days of data are available to estimate a  
184 baseline step count.

185 Participants that have been confirmed by the study team to have an appropriate baseline step count will be  
186 called and asked to select a step goal increase as follows:

187 *Goal Setting:* Each participant will be asked to choose a step goal increase that is between 33% and 50%  
188 higher than their baseline (each step goal will be rounded up to the nearest hundred). A participant may also  
189 select to choose another goal as long as it is at least 1500 steps greater than his or her baseline.

190 *Randomization:* Participants are considered ready to be randomized once they have completed all surveys,  
191 established a baseline step count, and selected a step goal increase. Participants will then be randomly  
192 assigned in blocks of three. Participants in all arms will be asked to complete end of study surveys at 20  
193 weeks on their experience in the study. The interventions within each arm are as follows:

194  
195  
196  
197  
198  
199  
200  
201  
202  
203  
204  
205  
206  
207  
208  
209  
210  
211  
212  
213  
214  
215  
216  
217  
218  
219  
220  
221  
222  
223  
224  
225  
226  
227  
228  
229  
230  
231  
232  
233  
234  
235  
236  
237  
238

*Arm 1: Control*

Participants in this arm will receive no other interventions during the 20-study.

*Arm 2: Social incentive-based gamification intervention*

Participants randomized to Arm 2 will play a game designed to leverage insights from behavioral economics and to enhance *supportive* social incentives.

At the beginning of each week the participant receives 70 points (10 for each day that week). If the participant does not achieve their step goal, they lose 10 points from their balance. This leverages loss aversion, which has been demonstrated to motivate behavior change more effectively with losses than gains. At the end of each week if the participant has at least 40 points, he or she will move up a level (levels from lowest to highest: blue, bronze, silver, gold, platinum). If not, participants will drop a level. All participants begin at the silver level. Each week, participants get a fresh set of 70 points on Monday.

Each participant will identify a family member or friend as a support sponsor. This sponsor will be encouraged to support the participant in their progress during the study. A weekly report will be sent by email to the sponsor with the participant’s performance (e.g., step goal, average step count for that week, points and level).

*Arm 3: Supportive social incentive intervention plus financial incentive*

Participants randomized to Arm 3 will play the same game as in Arm 2 but will also have \$120 placed in a virtual account. Each week if the participant reaches a higher level, having at least 40 points, they will keep the money in the account. If not, then \$10 will be deducted. This will leverage prior work demonstrating that loss framed financial incentives can be used to increase physical activity. A participant in Arm 3 must complete the full course of the study intervention timeline to obtain any of this amount (up to \$120).

**5.1.2. What research methods will be used in the project? Check all that apply.**

- Surveys/Questionnaires
- Behavioral Observations
- Focus Groups
- Control Group
- Specimen Collection
- Other (Describe) Physical activity tracking via a wearable device.
- Interviews
- Chart Reviews
- Randomization
- Placebo
- Deception
- Audio Taping
- Video Taping
- Double-Blind
- Withhold/Delay Treatment
- Telephone Survey

**5.1.3. Provide description of the study population (delineate all categories of subjects – male, female, inpatients, outpatients, providers, family members, employees, etc.). Include anticipated initial enrollment numbers (and number of subjects anticipated to complete all aspects of the protocol).**

The study population will include 180 participants total: 1) adults age 18 years or older; 2) interest in participating in a 20-week study using wearable devices to track step counts and increase physical activity; 3) body mass index of 25 or greater; 4) Smartphone or tablet compatible with application for the wearable activity tracking device.

**5.1.4. As applicable, provide rationale and information on any added protections and safeguards for vulnerable populations (children, prisoners, pregnant women, physically or mentally-disabled persons, and economically or educationally disadvantaged persons).**

This will not include children or prisoners. For other vulnerable populations, this study will only include subjects wishing to participate by wearing a physical activity tracking device. Those

individuals with physical disability which prevents them from wearing the device or for its proper tracking will not be included in the study.

239 5.1.5. Does this project target a specific race or ethnic group as subjects? **NOT APPLICABLE**

240 **If yes, check all that apply.**

241 **Race**

242 **Ethnicity**

243  American Indian or Alaska Native

244  Hispanic or Latino

245  Asian

246  Not Hispanic or Latino

247  Black or African American

248  Native Hawaiian or other Pacific Islander

249  White

250  Other

251 5.1.6. Will this study bank/store specimens for future research? **NO**

252 5.1.6.1. **If yes, include information on specimens to be banked/stored.**

253

254 5.1.6.2. **If specimens will be banked/stored, specify location.**

255

256 5.1.6.3. **If the location of the specimen bank is a non-VA site, has the mandatory approval from VA Central Office been obtained through submission of a tissue banking application? Choose an item.**

257 5.1.6.3.1. **If yes, provide a copy of the response from VA Central Office.**

258 5.1.6.3.2. **IF BANKING SPECIMENS, IT MUST BE AT A VA APPROVED FACILITY. (For additional information, go to the following website [http://www.research.va.gov/programs/tissue\\_banking/](http://www.research.va.gov/programs/tissue_banking/), or contact the IRB office.)**

259 5.1.6.4. **If applicable, explain how destruction of banked samples will be substantiated.**

260

261 5.1.6.5. **Do you anticipate using the banked specimens for other studies beyond the defined study period and defined study parameters? Choose an item.**

262 5.1.6.5.1. **If yes, will you need to re-contact subjects? How will this be done?**

263

264 5.1.7. **Will this study create a data repository for future studies? **NO****

265 5.1.7.1. **If yes, describe and/or provide the following:**

266 5.1.7.1.1. **The type of data (identified or de-identified) including what protected health elements are to be collected.**

267

268 5.1.7.1.2. **The source from which data will be collected (e.g., subjects, non-research data repositories, research data repositories, publicly available, VA source, non-VA source.**

269

270 5.1.7.1.3. **How and where the data will be stored (e.g., electronic, paper records, approved VA-owned or VA-leased space).**

271

272 5.1.7.1.4. **How the data will be transmitted, if applicable.**

273

- 287 5.1.7.1.5. **How the data will be secured during storage, use, and**  
 288 **transmission both during the conduct of the research protocol and**  
 289 **after the protocol is completed.**  
 290
- 291 5.1.7.1.6. **Plans to store data for future research. If the data is stored for**  
 292 **future research, there must be a description of a research data**  
 293 **repository, its location, and its security measures.**  
 294
- 295 5.1.7.1.7. **Plans to share with others including other researchers (VA and**  
 296 **non-VA). If the data were collected through a research project,**  
 297 **discussion of whether or not the original informed consent allowed**  
 298 **for such reuse of the data and if the reuse is consistent with the**  
 299 **HIPAA authorization that was obtained.**  
 300
- 301 5.1.7.1.8. **Justification for the use of any identifiers.**  
 302
- 303 5.1.7.1.9. **Justification that the data requested represent the**  
 304 **minimum necessary to conduct the research.**  
 305
- 306 5.1.7.1.10. **A discussion of plans for obtaining informed consent and**  
 307 **HIPAA Authorization, or for requesting the IRB to waive**  
 308 **these requirements. If the investigator requests that the**  
 309 **requirement for a HIPAA Authorization be waived,**  
 310 **justification for this request must be included in**  
 311 **information submitted to the IRB.**  
 312
- 313 5.1.7.1.11. **In addition to the above, provide a Standard Operating Procedures**  
 314 **Manual for the data repository. *Contact IRB office for additional***  
 315 ***details.***

316  
 317 **5.2. Subject Recruitment Methods**

- 318 5.2.1. **State how many subjects will be needed:** 180 total subjects, with 60 in each arm of the  
 319 study.
- 320  
 321 5.2.2. **Who will be responsible for recruiting potential subjects? Provide titles of**  
 322 **individuals.**  
 323 The study team will include:  
 324 Mitesh Patel, MD, MBA, MS – Principal Investigator  
 325 Anish Agarwal MD, MPH – Co-Investigator  
 326 Chalanda Evans – Project Manager  
 327 Victoria Hilbert – Project Manager  
 328 Kelsey Karpink – Clinical Research Coordinator  
 329 Rachel Djaraher – Clinical Research Coordinator
- 330  
 331 5.2.3. **How will initial contact with potential subjects be made? (e.g., local clinics,**  
 332 **physician referrals, letters to prospective subjects)**  
 333 Veterans receiving care at the CMCVAMC will be mailed a letter describing the study,  
 334 and study contact information. They will have the ability to opt out from future  
 335 communications if they like. If an individual is interested in the study, they will be  
 336 given the opportunity to ask questions and instructed to sign up for the study on the Way  
 337 to Health Platform. Then the veteran will be called to conduct oral consent and  
 338 eligibility and baseline surveys. The study team will mail the veteran a copy of the  
 339 consent form, a wearable device to track step counts and provide instructions to create  
 340 an account by which they will transmit de-identified step data to the research team.

We have designed the study to be conducted remotely for recruitment, enrollment and the study design. This will allow Veterans to review the study and design in the comfort of their own homes with a member of the study team able to answer questions by phone. It will also reduce time burden any costs that would otherwise be placed on Veterans if he or she had to travel to the CMCVAMC for an in-person visit.

5.2.4. Will you be using any of the following methods to recruit subjects? (Check all that apply.)

N/A

*X-Vinci* Local database for which subjects have NOT given prior permission to be contacted for Research.

Personal contact with patients over whom you have direct/indirect oversight

Provider (Clinician) Referrals of potential subjects

5.2.5. Indicate the types of recruitment/advertisement materials that will be used: Check all that apply. Submit copies of recruitment materials, for IRB review.

*X* Not applicable; none to be used

Fliers  Newspapers  Letters  Websites  Television

Radio  Audio  Video  Surveys

Other (Specify, e.g. employee newsletters)

5.2.6. Non-Veteran Subjects will be given a copy of the Notice of Privacy Practices.

5.3. Compensation for Participation -  If yes, complete the following.

5.3.1. Summarize any financial compensation that will be offered to subjects.

All participants will receive \$25 to enroll in the study (defined as being randomized and starting the intervention) and another \$50 for completing the entire 20-week study. Participants randomized to the supportive social incentive intervention and financial incentive arm will have the opportunity to obtain up to an additional \$120.

5.3.2. Provide the schedule for compensation.

5.3.2.1. Per study visit or session.

N/A

5.3.2.2. Total amount for entire participation.

5.3.3. State how compensation will be provided:

5.4. Informed Consent Procedures

5.4.1. Indicate if informed consent will be obtained and/or if you are requesting a waiver of informed consent or waiver of documentation of informed consent.

5.4.2. If the research involves multiple phases, specify for which phases of the research the waiver(s) is/are being requested.

5.4.3. Describe circumstances, if any, that may need to be addressed in seeking informed consent (e.g., subjects with impaired decision making ability and the use of a legally authorized representative, etc.)



391 **Not applicable.**

392  
393 5.4.4. **If applicable, indicate how study personnel will be trained regarding human subjects**  
394 **protections requirements and how to obtain and document informed consent.**

395 All study personnel will have completed the required human subjects, HIPAA, and information  
396 security and privacy trainings at the VA.

397  
398 5.4.5. **Inclusion/Exclusion Criteria: Describe the criteria that determine who will be included in**  
399 **or excluded from the study.**

400 5.4.5.1. **Inclusion Criteria**

401 1) Age 18 years or older; 2) interest in participating in a 20-week study using wearable devices  
402 to track step counts and increase physical activity; 3) body mass index of 25 or greater; 4)  
403 Smartphone or tablet compatible with application for the wearable activity tracking device.

404 5.4.5.2. **Exclusion Criteria**

405 1) Conditions that would make participation infeasible such as inability to provide informed  
406 consent, illiteracy or inability to speak, read, and write English; 2) conditions that would make  
407 participation unsafe such as pregnancy or being told by a physician not to exercise; 3) already  
408 enrolled in another study targeting physical activity; 4) any other medical conditions or reasons  
409 he or she is unable to participate in a physical activity study for 20 weeks.

410 5.5. **Withdrawal of Subjects**

411 5.5.1. **Describe how a subject can withdraw from the study.**

412 Subjects may withdraw at any point by informing the study team either by written mail  
413 or by phone.

414  
415  
416 5.5.2. **Describe any anticipated circumstances under which subjects will be withdrawn**  
417 **from the research without their consent.**

418 None.

419  
420 5.5.3. **Describe the consequences of a subject's decision to withdraw from the research**  
421 **and the procedures for orderly termination of participation by the subject (e.g., the**  
422 **subject contacting the investigator for an end-of-study visit).**

423 Patients choosing to withdraw early in the study will not receive the total compensation  
424 as described above. Patients are free to, at any time, contact the study team to be  
425 removed from the study.

426  
427 5.6. **Potential Risk/Benefit Analysis**

428 5.6.1. **Potential Study Risks**

429 5.6.1.1. **Describe and assess all of the following risks that may be associated with the**  
430 **research:**

431 5.6.1.2. **Physical**

432 To minimize the chance for serious and unexpected adverse events, study participants  
433 will be screened through exclusion criteria for any health conditions that may be  
434 exacerbated by participating in a physical activity study. The program will use a  
435 gradual increase in physical activity during the first month that should pose little  
436 health risk to participants. Participants are given guidance on when to seek medical  
437 attention and a reporting protocol is in place to capture any changes in symptoms  
438 with physical activity.

439 5.6.1.3. **Psychological:** Not applicable.

440  
441 5.6.1.4. **Social/Economic**

442 Each participant in the two intervention arms will identify a support partner (friend or  
443 family member) who will receive weekly updates by email on their progress in the

444 game. That support partner will be encouraged to help the participant to achieve their  
445 goals.

446  
447 5.6.1.5. **Legal:** Not applicable.

448  
449 5.6.1.6. **Loss of Confidentiality**

450 A potential risk of this study is a breach of participant confidentiality. We will minimize this risk  
451 by using secure data methods as described previously. Names and addresses will be stored in  
452 encrypted databases. These data will be viewable only by the respective participants and the  
453 study coordinator. All other members of the research team will be able to view only participant  
454 ID numbers. There will be no functionality in the web application to export a dataset with  
455 identifiable information. Even the study arms will be identified by code letters until both the  
456 statistician and PI agree that analysis is complete.

457  
458 5.6.1.7. **Other, e.g. radiation, placebo, washout of medications:** Not applicable

459 5.6.1.8. **Assess the likelihood and seriousness of such risks.:** Not applicable

460  
461 5.6.2. **Include a description of how anticipated risk will be minimized and include an  
462 analysis of risk vs. potential benefit.**

463 Anticipated risks of this study should be minimal and the risk/benefit ratio is very favorable. To  
464 minimize the chance for serious and unexpected adverse events, study participants will be  
465 screened through exclusion criteria for any health conditions that may be exacerbated by  
466 participating in this study. We have previously outlined the procedures that will be used to  
467 prevent a breach of participant data.

468  
469 5.6.3. **Potential Study Benefits**

470 5.6.3.1. **Indicate potential benefits to be gained by the individual subjects, as well as  
471 benefit(s) that may accrue to society in general as a result of the planned work.  
472 If the subject will not receive any direct benefit, this fact must be stated here  
473 and in the consent form.**

474 Through participation in this study, each participant will have the potential to increase physical  
475 activity which could improve their health and reduce their risk for future disease. If this approach  
476 is effective, it could have tremendous benefits for society if adopted on a wide scale to help  
477 individuals. It is expected that other people will gain knowledge from this study and that  
478 participation could help understand how to effectively motivate individuals to change behavior.  
Participants may also receive no benefit from their participation in the study.

479  
480 5.6.4. **Alternative Treatments Outside the Study**

481 5.6.4.1. **Describe alternatives available to the subject outside the research context. If  
482 there are no such alternatives, state that the alternative is not to participate in  
483 the research study.**

484 The alternative is not to participate in the research study.

485  
486 5.7. **Data Monitoring**

487 5.7.1. **Will a Data and Safety Monitoring Board (DSMB) or Data Monitoring Committee (DMC)  
488 oversee the project?**  NO

489 5.7.1.1. **If yes, provide contact information for the DSMB or DMC representative.**

490 5.7.1.2. **If no, describe the data and safety monitoring plan to be followed.**

491 The Principal Investigator will be responsible for monitoring the study. All participants will be  
492 given anticipatory guidance on when to seek medical attention. In addition, participants will be  
493 asked to report to the study team any injuries or medical care that they feel resulted from  
494 participation in the study. They can either call the study team or send an email. The research  
495 coordinator will call the participant to collect information regarding the issue and then the PI will  
496 review and determine whether it is ok to proceed, further investigation is needed, or the

497 participant should stop the study. For this study, there will be no stopping rules or endpoints and  
498 thus no planned interim analyses.

5.8. **Reporting of Protocol Deviations, Adverse Events (AEs), Serious Adverse Events (SAEs), Breaches of Confidentiality, Unanticipated Adverse Device Effects (UADEs), and Unanticipated/Unexpected Problems**

5.8.1. **Include procedures for reporting these events to the CMCVAMC IRB and sponsor.**

Standard protocol will be followed for any events including reporting to the CMCVAMC IRB within 5 business days of discovery. We will use the CMCVAMC serious-adverse event form for reporting SAEs, UADEs, and any other unanticipated/unexpected problems. We will also use the CMCVAMC Protocol Deviation form for reporting any protocol deviations. Any true adverse events will be reported immediately.

5.9. **Privacy and Confidentiality**

5.9.1. **Describe whether the study will use or disclose subjects' Protected Health Information (PHI).**

In order to provide subjects with compensation for enrollment, the study will collect PHI. No PHI will be disclosed to any person outside of the research team.

5.9.2. **Check the PHI to be collected on all subjects for this research protocol.**

- Name**
- All geographic subdivisions smaller than a State, including street address, city, county, precinct, ZIP code, and their equivalent geographical codes, except for the initial three digits of a ZIP code if, according to the current publicly available data from the Bureau of the Census:**
  - a. The geographic unit formed by combining all ZIP Codes with the same three initial digits contains more than 20,000 people; and**
  - b. The initial three digits of a ZIP Code for all such geographic units containing 20,000 or fewer people are changed to 000.**
- All elements of dates (except year) for dates directly related to an individual, including birth date, admission date, discharge date, date of death; and all ages over 89 and all elements of dates (including year) indicative of such age, except that such ages and elements may be aggregated into a single category of age 90 or older.**
- Telephone numbers**  **Fax numbers**
- Electronic mail addresses**  **Social Security/Medical Record Number**
- Health plan beneficiary numbers**  **Account Numbers**
- Certificate/license numbers**
- Vehicle identifiers and serial numbers, including license plate numbers**
- Device identifiers and serial numbers**
- Web universal resource locators (URLS)**
- Internet protocol (IP) address numbers**
- Biometric identifiers, including fingerprints and voiceprints**
- Full-face photographic images and any comparable images**
- Any other unique identifying number, characteristic, or code, unless otherwise permitted by the Privacy Rule for re-identification.**

543  
544  
545  
546  
547  
548  
549  
550  
551  
552  
553  
554  
555  
556  
557  
558  
559  
560  
561  
562  
563  
564  
565  
566  
567  
568  
569  
570  
571  
572  
573  
574  
575  
576  
577  
578  
579  
580  
581  
582  
583  
584  
585  
586  
587  
588  
589  
590  
591  
592  
593  
594  
595

- HIV (testing or infectious disease) records
- Sickle cell anemia
- Drug Abuse Information
- Alcoholism or Alcohol Use

5.10. **Information Security**

5.10.1. **List the data/information that will be stored (including signed, original informed consent and HIPAA authorization forms, if applicable, case report forms, etc.)**

Stored data and information will include: patient information including name, last 4 of SSN, date of birth, BMI, medical, problem list, signed, original informed consent forms, baseline questionnaires capturing participants' sociodemographic information, technology assessment, and current level of physical activity, any responses from follow-up phone interviews.

5.10.2. **Describe the steps that will be taken to secure the data (e.g., training, authorization of access, password protection, encryption, physical controls, Certificates of Confidentiality and separation of identifiers and data).**

All study personnel will complete the required human subjects, HIPAA, and information security and privacy trainings at the VA. Each Veteran who enrolls in this study will be assigned a unique, random patient ID number generated for the purposes of this study. To protect each participant's identity, the link between the Veteran's name, last 4 of SSN, date of birth, and patient ID number will be a password protected file stored on a secure VA server and accessible only to research staff. In all subsequently created analytical files, participants will only be identified by their patient ID number, without inclusion of his/her name, SSN, or date of birth. Subject questionnaires will be either directly inputted into a computer database or written onto paper forms and then transferred to a database at a later time. Interview transcripts will be produced electronically and will be housed on a secure VA server as well. No results will be reported in a personally identifiable manner.

5.10.3. **Indicate how and where data/information will be stored, and specify pertinent security systems.**

The file linking Veterans' personal identifying information, patient database, questionnaire data, and interview transcripts will be password protected and stored on a secure VA server located within the VA firewall. Participant questionnaire data not containing PHI/PII will be stored in REDCap within the VA firewall. The server is physically located within the FITS computer room of the Philadelphia VAMC and networked within the VA Intranet. Thus, the servers have the same degree of physical and electronic protection afforded other VA computer systems, including antiviral protection and routine back-ups. FITS is responsible for managing the server hardware and software, including its physical and network security and connectivity, backup processes, operating system patches, and application management. Study data will be accessed using password protected computers that are not connected to the Internet and are entirely compliant with Federal Information Security Management Act (FISMA) standards. Paper records will be kept in a locked file cabinet in an electronically secured building. The likelihood of loss of confidentiality is very low given the information security and privacy requirements that are in place.

The study will use the "Way to Health" platform to provide close monitoring, feedback and reinforcement at a low cost to permit cost-effective flexible, scalable infrastructure. This platform has been used for a clinical trial at the CMCVAMC in the past. The platform was built at the University of Pennsylvania and aims to improve health behaviors and consists of a portal with links to variety of peripheral devices (e.g., scales, wearable devices, glucometers) for assessing health behaviors and outcomes; the capacity to communicate back to patients using interactive voice recording; and the ability to automate the delivery of feedback reports. For this study, step goals and reports will be sent to subjects (and if in "social incentive arm", reports will also be mailed to the support partner).

596 Once patients have consented to be in the study and have their data managed by *Way to Health*  
597 (WTH), the WTH platform adherence tracking information will be stored according to a unique,  
598 random, patient identifier generated for the purposes of the study. To assure that subject,  
599 physician and other informant confidentiality is preserved, individual identifiers (such as name  
600 and medical record number) are stored in a single password protected system that is accessible  
601 only to study research, analysis and IT staff. This system is hosted onsite at the University of  
602 Pennsylvania (UPenn) and is protected by a secure identification number (ID). Any datasets and  
603 computer files that leave the firewall will be stripped of all identifiers and individuals will be  
604 referred to by their study ID. The study ID will also be used on all analytical files.  
605

606 The University of Pennsylvania Biomedical Informatics Consortium (BMIC) is the hub for the  
607 hardware and database infrastructure. The data collected for *Way to Health* based studies is  
608 stored in MySQL databases on a BMIC-operated blade server environment devoted specifically  
609 to *Way to Health*. The data center is housed in the Information Systems and Computing at 3401  
610 Walnut Street. All data are stored in a single relational database, allowing researchers to correct  
611 mistakes. Every SQL transaction, including accessing and changing data is logged for auditing  
612 purposes. Data are entered into the database through several different mechanisms. A program  
613 specialist will enter subjects' personal information and responses to survey questions through a  
614 PHP-based web interface. Data from monitoring devices are uploaded automatically. Datasets  
615 are blinded of all personally identifiable information when exported for analysis. The web  
616 application automatically removes all identifiers when a member of the research team requests  
617 an analytic dataset. The only people with access to identifiable participant information are pre-  
618 specified Research Coordinators responsible for contacting participants. Personal information  
619 and research data will be stored in separate SQL tables and will be linked by a computer-  
620 generated ID number. All data for this project will be stored on the secure/firewalled servers for  
621 the BMIC Data Center, in data files that will be protected by multiple password layers. These  
622 data servers are maintained in a guarded facility behind several locked doors, with very limited  
623 physical access rights. They are also cyber-protected by extensive firewalls and multiple layers  
624 of communication encryption. Electronic access rights are carefully controlled by UPenn system  
625 managers. We believe this multi-layer system of data security, identical to the system protecting  
626 the University of Pennsylvania Health System medical records, greatly minimizes the risk of loss  
627 of privacy.

628 5.10.4. **Will PHI be transmitted or transported outside of CMCVAMC?** NOT APPLICABLE  
629 **If yes, complete sections 5.10.4.1 through 5.10.4.3, and an Off-site Storage/Transfer of**  
630 **Research Data form. If no, go directly to section 5.11.**

631 5.10.4.1. **Does the informed consent document and Authorization for Use & Release of**  
632 **Individually Identifiable Health Information for Veterans Health**  
633 **Administration (VHA) Research form disclose entities/individuals to**  
634 **which/whom PHI will be transported or transmitted?** Choose an item.

635 5.10.4.2. **Specify entities/individuals outside CMCVAMC to which/whom data will be**  
636 **disclosed, the justification for such disclosure and the authority, and how they**  
637 **will access it.**

638   
639 5.10.4.3. **List the data/information that will be transmitted or transported, and specify**  
640 **how data will be transported or transmitted from one location to another and**  
641 **how it will be protected during transmission or transportation outside of**  
642 **CMCVAMC.**

643

644 5.11. **Data Management Access Plan**

645 5.11.1. DMAP form **must** be included with all **initial** submissions. The DMAP form can be found on  
646 the Research and Development SharePoint site.  
647

648 5.12. **Communication Plan**  
649

650  
651  
652  
653  
654  
655  
656

5.12.1. **Include plan for ensuring that the study is conducted according to the IRB-approved protocol.**

All study personnel will meet regularly to ensure that the study is conducted according to the IRB approved protocol. At these meetings, they will discuss unforeseen challenges as they arise and together create a plan for troubleshooting these issues within the confines of the IRB approved protocol.

657  
658  
659  
660  
661  
662

5.13. **Is this Study Investigating the Use of a Drug or Biological Agent?**  **NO** **If yes, complete the rest of this section. If no, go directly to section 6, unless 5.13 applies.**

5.13.1. **Specify if the drug or biological agent is:**

5.13.1.1. **FDA approved:**

5.13.1.2. **Used for off-label purposes:**

663  
664  
665  
666

5.13.2. **Include the FDA Investigational New Drug (IND) number for all non-FDA approved and off-label drugs, biological agents or nutritional supplements. If not applicable state, "Not Applicable."**

667

5.13.3. **Provide all relevant information about the drug, including pre-clinical data.**

668

669

5.13.4. **Explain any wash-out periods, rescue medications permitted and any type of medications not permitted while enrolled in the study.**

670

671

5.13.5. **Describe blinding and un-blinding procedures.**

672

673

5.13.6. **Include the dosage, route of administration, previous use, and the safety and efficacy information on any drug used for research purposes.**

674

675

5.13.7. **Describe rationale for the dosage in this study.**

676

677

5.13.8. **Justify why the risks are reasonable in relation to anticipated benefits and/or knowledge.**

678

679

5.13.9. **Describe where drug preparation will be done.**

680

681

5.13.10. **All drugs for CMCVAMC subjects must be dispensed through the VA investigational pharmacy.**

682

683

5.13.11. **Describe where the study treatment will be administered.**

684

685

5.13.12. **Describe plan for tracking a non-compliant treatment study subject.**

686

687

688

689

690

691

692

701 5.13.13. Describe the process for the storage, security, dispensing and return of an investigational  
702 drug.

703

704  
705 5.13.14. Has this protocol has been submitted to the Medical Center's Pharmacy and Therapeutics  
706 Committee?  *Choose an item.*

707  
708 5.14. **Is this Study Investigating the Use of a Device** -  *NOT APPLICABLE* If yes, complete the rest of this  
709 section. **If no, go directly to section 6.**

710 5.14.1. The Investigational Device Exemption (IDE) number must be submitted for all significant  
711 risk devices and if an IDE exists for a non-significant risk device.

712

713  
714 5.14.2. Significant Risk or Non-significant Risk - If a device is not approved by the FDA, specify  
715 whether or not the sponsor has determined this device to be a "significant risk" or "non-  
716 significant risk" as defined by the FDA.

717

718  
719 5.14.3. Provide all relevant information about the device.

720

721  
722 5.14.4. Describe blinding and un-blinding procedures.

723

724  
725 5.14.5. Specify if device is:

726 5.14.5.1. FDA approved:  *Choose an item.*

727 5.14.5.2. Used for off-label purposes:  *Choose an item.*

728  
729 5.14.6. Explain if the investigational device will be delivered and/or stored by the Principal  
730 Investigator or Pharmacy Service.

731

732  
733 5.14.7. Describe the process for the storage, security, dispensing and return of an investigational  
734 device.

735

736  
737 5.14.8. For research involving an investigational device, describe the SOP or plan for device  
738 control.

739

740  
741 5.14.9. Address how the device will be stored in such a way that only research staff associated with  
742 the protocol will have access to the device.

743

744  
745 5.14.10. Describe measures that will be put into place to ensure that the device will only be used in  
746 subjects of this research protocol.

747

748  
749 **Section 6: Resources and Personnel**

750 6.1. **Include where and by whom the research will be conducted.**

751 The study will be coordinated out of the CMCVAMC and subjects will wear tracking devices during their  
752 normal activity throughout the study time period. The team includes: Mitesh Patel, MD, MBA, MS –  
753 Principal Investigator, Anish Agarwal MD, MPH – Co-Investigator, Chalanda Evans – Project Manager,

Victoria Hilbert – Project Manager, Kelsey Karpink – Clinical Research Coordinator, and Rachel Djaraher – Clinical Research Coordinator.

6.2. **Provide a brief description of each individual’s role in the study. Indicate who will have access to protected health information and who will be involved in recruiting subjects; obtaining informed consent; administering survey/interview procedures; and performing data analysis.**

The team includes: Mitesh Patel, MD, MBA, MS – Principal Investigator, Anish Agarwal MD, MPH – Co-Investigator, Chalanda Evans – Project Manager, Victoria Hilbert – Project Manager, Kelsey Karpink – Clinical Research Coordinator, and Rachel Djaraher – Clinical Research Coordinator. These team members will only have access to PHI and will be working collectively to recruit subjects, obtain consents and administer surveys. Mitesh Patel and Anish Agarwal will perform data analysis.

6.3. **If applicable, provide information on any services that will be performed by contractors, including what is being contracted out and with whom.**

Not applicable.

6.4. **If applicable, provide information on any Memoranda of Understanding (MOUs) or Data Use Agreements (DUAs) that are being entered into, including with whom and for what reason.**

Not applicable.

**Section 7: Genetic Testing**

7.1. **Does the project involve genetic testing?**

7.2. **Will specimens be kept for future, unspecified use?**

7.3. **Will samples be made anonymous to maintain confidentiality?**  (If there is a link, it is not anonymous. Coding is not anonymous.)

7.4. **Will specimens be destroyed after the project-specific use is completed?**

7.5. **Will specimens be sold in the future?**

7.6. **Will subjects be paid for their specimens now or in the future?**

7.7. **Will subjects be informed of the results of the specimen testing?**

7.8. **Are there any implications for family members based on specimen testing results?**

7.8.1. If answer to section 7.8 is yes, they may be subjects.

7.9. **Will subjects be informed of results obtained from their DNA?**

7.10. **Explain if the study is looking for an association between a genetic marker and a specific disease or condition, but at this point it is not clear if the genetic marker has predictive value.**

7.11. **Describe if the study is based on the premise that a link between a genetic marker and a specific disease or condition is such that the marker is clinically useful in predicting the development of that specific disease or condition.**

7.12. **Will the subject be notified of the results and the provision for genetic counseling?**

**Section 8: International Research**



808 8.1. Does this study involve international research? **NOT APPLICABLE** If no, go directly to section 9.

809

810 **Section 9: Statistical Analysis**

811 9.1. **Include statistical power calculations and the assumptions made in making these calculations.**

812 This study has been powered for two phases of hypothesis testing. In the first phase, we will compare each  
813 of the two intervention arms to control. We estimate that a sample of 180 participants allocated in a 1:1:1  
814 distribution, will ensure at least 80% power to detect a 900-step difference between each intervention arm  
815 and control, with a standard deviation of 1500 steps. This calculation assumes a 10% missing data rate and  
816 a conservative Bonferroni adjustment of the type I error rate with a 2-sided alpha of 0.025. In the second  
817 phase, we will compare successful intervention arms to each other. We expect that the magnitude of  
818 difference between intervention arms will be less than that of successful intervention arms compared to  
819 control. For this second phase of analyses will use a conservative Bonferroni adjustment of the type I error  
820 rate with a 2-sided alpha of 0.017 to adjust for up to 3 comparisons. In 2012, more than 57,500 veterans  
821 enrolled for care at CMCVAMC and comprised nearly 463,000 visits. Since 70% of veterans are  
822 overweight or obese, nearly 40,000 veterans may be eligible for this study. Based on this data and prior  
823 studies, we estimate that we can fill the study within 6 months. We will plan to oversample women and  
824 minorities in the recruitment process.

825 9.2. **Define plans for data and statistical analysis, including key elements of the statistical plan, stopping  
826 rules and endpoints.**

827 Data from the clinical trial will be analyzed using statistical software in SAS or R. In our primary analyses,  
828 we will multiple imputation for missing data and step values less than 1000. We will use linear mixed  
829 effects models to compare the change in mean daily step count from baseline to intervention period (weeks  
830 5 to 12), adjusting for baseline step count and time. To test of the robustness of our findings we will also  
831 evaluate models using collected data without imputation. We will conduct similar models for the secondary  
832 outcome of change in mean daily steps from baseline to follow-up and use logistic models for the  
833 secondary outcomes of proportion of participant-days meeting goal during intervention and follow-up. All  
834 hypothesis tests will use a conservative Bonferroni adjustment as described in the power calculation.

835

836 9.3. **Provide sample size determination and analysis (include anticipated rate of screen failures, study  
837 discontinuations, lost to follow-up, etc.)**

838 See above.

839

840 9.4. **Describe how, where and by whom the data will be analyzed.**

841 The data will be analyzed by Mitesh Patel and Anish Agarwal with the help of CHERP faculty at  
842 the VA.

843

844

845

846

847

848

849

850

851

852

853 **Section 10: References**

- 854 1. Ischemic Heart Disease Quality Enhancement Research Initiative. U.S. Department of Veterans Affairs. June  
855 2014. Available online at: [http://www.queri.research.va.gov/about/impact\\_updates/IHD.pdf](http://www.queri.research.va.gov/about/impact_updates/IHD.pdf). Accessed  
856 January 26, 2017
- 857 2. Lee IM, Shiroma EJ, Lobelo F, Puska P, Blair SN, Katzmarzyk PT, Lancet Physical Activity Series Working  
858 Group. Effect of physical inactivity on major non-communicable diseases worldwide: an analysis of burden  
859 of disease and life expectancy. *Lancet*. 2012;380(9838):219-29.
- 860 3. Littman AJ, Forsberg CW, Koepsell TD. Physical activity in a national sample of veterans. *Med Sci Sports  
861 Exerc*. 2009;41(5):1006-13.
- 862 4. Patel MS, Asch DA, Volpp KG. Wearable Devices as Facilitators, Not Drivers, of Health Behavior Change.  
863 *JAMA*. 2015;313(5):459-60.
- 864 5. Evidence-based Synthesis Program. The impact of wearable motion sensing technologies on physical activity: A  
865 systematic review. Department of Veterans Affairs Health Services Research & Development Service.  
866 September, 2015.
- 867 6. Loewenstein G, Brennan T, Volpp KG. Asymmetric paternalism to improve health behaviors. *JAMA*.  
868 2007;298(20):2415-7.
- 869 7. Patel MS, Asch DA, Rosin R, Small DS, Bellamy SL, Heuer J, Sproat S, Hyson C, Haff N, Lee SM, Wesby L,  
870 Hoffer K, Shuttleworth D, Taylor D, Hilbert V, Zhu J, Yang L, Wang X, Volpp KG. Framing financial  
871 incentives to increase physical activity among overweight and obese adults: a randomized, controlled trial.  
872 *Ann Intern Med*. 2016;164(6):385-394.
- 873 8. Patel MS, Asch DA, Rosin R, Small DS, Bellamy SL, Eberbach K, Walters KJ, Haff N, Lee SM, Wesby L,  
874 Hoffer K, Shuttleworth D, Taylor D, Hilbert V, Zhu J, Yang L, Wang X, Volpp KG. Individual versus  
875 team-based financial incentives to increase physical activity: a randomized, controlled trial. *JGIM*.  
876 2016;31(7):746-754.
- 877 9. Patel MS, Volpp KG, Rosin R, Bellamy SL, Small DS, Fletcher MA, Osman-Koss R, Brady JL, Haff N, Lee SM,  
878 Wesby L, Hoffer K, Shuttleworth D, Taylor DH, Hilbert V, Zhu J, Yang L, Wang X, Asch DA. A  
879 randomized trial of social comparison feedback and financial incentives to increase physical activity. *Am J  
880 Health Promot*. 2016;30(6):416-424.
- 881 10. Richlie D, Winters S, Prochazka AV. Dyslipidemia in veterans: Multiple risk factors may break the bank.  
882 *Arch Intern Med*. 1991;151:1433-1436.
- 883 11. Asch DA, Rosin R. Engineering social incentives for health. *N Engl J Med*. 2016; 375:2511-2513.
- 884 12. Christakis NA, Fowler JH. The spread of obesity in a large social network over 32 years. *N Engl J Med*.  
885 2007;357(4):370-9.
- 886 13. Christakis NA, Fowler JH. The collective dynamics of smoking in a large social network. *N Engl J Med*.  
887 2008;358(21):2249-58.
- 888 14. Jackson SE, Steptoe A, Wardle J. The Influence of Partner's Behavior on Health Behavior Change: The  
889 English Longitudinal Study of Ageing. *JAMA Intern Med*. 2015;175(3):385-92.
- 890 15. Case MA, Burwick HA, Volpp KG, Patel MS. Accuracy of Smartphone Applications and Wearable

- 891            Devices for Tracking Physical Activity Data. *JAMA*. 2015;313(6):625-626.
- 892    16.    Das SR, Kinsinger LS, Yancy WS, Wang A, Ciesco E, Burdick M, Yevich SJ. Obesity prevalence among  
893            veterans at Veterans Affairs medical facilities. *Am J Prev Med*. 2005;28(3):291-4.
- 894    17.    Asch DA, Volpp KG. On the Way to Health. *LDI Issue Brief*. 2012;17(9).
- 895    18.    Ariely D, Wertenbroch K. Procrastination, deadlines, and performance: self-control by precommitment.  
896            *Psychol Sci*. 2002;13(3):219–24.
- 897    19.    Rogers T, Milkman KL, Volpp KG. Commitment Devices: Using Initiatives to Change Behavior. *JAMA*.  
898            2014;311(20):2065-6.
