# Supplementary material for: Effect of Gamification With and Without Financial Incentives to Increase Physical Activity Among Veterans Classified as Having Obesity or Overweight: A Randomized Clinical Trial
Source: PubMed Central journal article supplement (PMC8271358; doi:10.1001/jamanetworkopen.2021.16256), 2021-07-09
Supplement: jamanetwopen-e2116256-s002.pdf [file jamanetwopen-e2116256-s002.pdf]

## Supplemental Online Content

Agarwal AK, Waddell KJ, Small DS, et al. Effect of gamification with and without financial incentives to increase physical activity among veterans classified as having obesity or overweight: a randomized clinical trial. *JAMA Netw Open*. 2021;4(7):e2116256. doi:10.1001/jamanetworkopen.2021.16256

**eTable 1.** Missing Data Rates by Arm and Study Period

**eTable 2.** Adjusted Differences in Outcomes Without Multiple Imputation

**eTable 3.** Patient Perceptions of Trial Experience From End-of-Study Surveys

This supplemental material has been provided by the authors to give readers additional information about their work.

**eTable 1: Missing Data Rates by Arm and Study Period**

| <b>Variable</b>                          | <b>Control</b>    | <b>Gamification with Social Support</b> | <b>Gamification with Social Support and Loss-Framed Financial Incentives</b> |
|------------------------------------------|-------------------|-----------------------------------------|------------------------------------------------------------------------------|
| <b>Physical Activity (steps per day)</b> |                   |                                         |                                                                              |
| <b>Weeks 1-12</b>                        |                   |                                         |                                                                              |
| Missing or 0                             | 523/5040 (10.4%)  | 800/5040 (15.8%)                        | 715/5040 (14.1%)                                                             |
| Value 1 to 999                           | 176/5040 (3.5%)   | 175/5040 (3.5%)                         | 147/5040 (2.9%)                                                              |
| Event missing                            | 39/5040 (0.7%)    | 2/5040 (0.03%)                          | 39/5040 (0.7%)                                                               |
| <b>Weeks 1-4</b>                         |                   |                                         |                                                                              |
| Missing or 0                             | 90/1680 (5.5%)    | 145/1680 (8.6%)                         | 122/1680 (7.3%)                                                              |
| Value 1 to 999                           | 49/1680 (2.9%)    | 46/1680 (2.7%)                          | 36/1680 (2.1%)                                                               |
| Event missing                            | 24/1680 (1.4%)    | 2/1680 (0.1%)                           | 8/1680 (0.5%)                                                                |
| <b>Weeks 5-12</b>                        |                   |                                         |                                                                              |
| Missing or 0                             | 433/3360 (12.9%)  | 655/3360 (19.5%)                        | 593/3360 (17.6%)                                                             |
| Value 1 to 999                           | 127/3360 (3.8%)   | 129/3360 (3.8%)                         | 111/3360 (3.3%)                                                              |
| Event missing                            | 15/3360 (0.5%)    | 0/3360 (0.0%)                           | 31/3360 (0.9%)                                                               |
| <b>Weeks 13-20</b>                       |                   |                                         |                                                                              |
| Missing or 0                             | 1021/3360 (30.3%) | 1152/3360 (34.3%)                       | 1276/3360 (38.0%)                                                            |
| Value 1 to 999                           | 116/3360 (3.5%)   | 122 (3.6%)                              | 110/3360 (3.3%)                                                              |
| Event missing                            | 0/3360 (0.0%)     | 2/3360 (0.1%)                           | 51/3360 (1.5%)                                                               |

\*Event missing periods defined as events where participants lost their device/charger and were waiting for a replacement, was hospitalized, injured, or other reasons that may have impacted their daily step count or resulted in missing activity data.

**eTable 2: Adjusted Differences in Outcomes Without Multiple Imputation**

| Variable                                 | Timeline                                   | Control     | Gamification with Social Support | Gamification with Social Support and Loss-Framed Financial Incentives |
|------------------------------------------|--------------------------------------------|-------------|----------------------------------|-----------------------------------------------------------------------|
| <b>Steps per day</b>                     | <b>Baseline</b>                            |             |                                  |                                                                       |
|                                          | Mean (SD)                                  | 5881 (2038) | 6012 (2494)                      | 6105 (2320)                                                           |
|                                          | <b>Intervention Period (Weeks 5 to 12)</b> |             |                                  |                                                                       |
|                                          | Difference relative to Control (95% CI)    | -           | 463 (-324, 1250)                 | 1123 (317, 1928)                                                      |
|                                          | <i>P</i> Value                             | -           | 0.48                             | 0.02                                                                  |
| <b>Steps per day</b>                     | <b>Baseline</b>                            |             |                                  |                                                                       |
|                                          | Mean (SD)                                  | 6195 (3767) | 6012 (2494)                      | 6105 (2320)                                                           |
|                                          | <b>Follow-up Period (Weeks 13 to 20)</b>   |             |                                  |                                                                       |
|                                          | Difference relative to Control (95% CI)    | -           | -211 (-1142, 720)                | 80 (-852, 1012)                                                       |
|                                          | <i>P</i> Value                             | -           | 0.89                             | 0.98                                                                  |
| <b>Proportion of Days Achieving Goal</b> | <b>Intervention Period (Weeks 5 to 12)</b> | 0.25        |                                  |                                                                       |
|                                          | Difference relative to Control (95% CI)    | -           | 0.22 (0.18, 0.25)                | 0.34 (0.30, 0.39)                                                     |
|                                          | <i>P</i> Value                             | -           | <0.001                           | <0.001                                                                |
| <b>Proportion of Days Achieving Goal</b> | <b>Follow-up Period (Weeks 13 to 20)</b>   | 0.26        |                                  |                                                                       |
|                                          | Difference relative to Control (95% CI)    | -           | 0.07 (0.04, 0.10)                | 0.13 (0.09, 0.17)                                                     |
|                                          | <i>P</i> Value                             | -           | <0.001                           | <0.001                                                                |

**eTable 3: Patient Perceptions of Trial Experience From End-of-Study Surveys**

| Survey Measures (n)                                        | Control    | Gamification with Social Support | Gamification with Social Support and Loss-Framed Financial Incentives) |
|------------------------------------------------------------|------------|----------------------------------|------------------------------------------------------------------------|
| <b>Follow-up Survey</b>                                    |            |                                  |                                                                        |
| Previously heard of device                                 |            |                                  |                                                                        |
| Yes                                                        | 50 (83.3%) | 48 (80.0%)                       | 42 (72.4%)                                                             |
| No                                                         | 5 (8.3%)   | 9 (15.0%)                        | 10 (17.2%)                                                             |
| Missing                                                    | 5 (8.3%)   | 3 (5.0%)                         | 8 (13.8%)                                                              |
| Like Device (Love it)                                      | 30 (50.0%) | 25 (41.7%)                       | 24 (41.4%)                                                             |
| Frequency of Device Wear                                   |            |                                  |                                                                        |
| Never                                                      | 12 (20%)   | 10 (16.7%)                       | 14 (24.1%)                                                             |
| 1-3 hours per day                                          | 1 (1.7%)   | 2 (3.3%)                         | 0 (0.0%)                                                               |
| 3-6 hours per day                                          | 0 (0.0%)   | 2 (3.3%)                         | 1 (1.7%)                                                               |
| 6-10 hours per day                                         | 4 (6.7%)   | 0 (0.0%)                         | 1 (1.7%)                                                               |
| Over 10 hours per day                                      | 3 (5.0%)   | 6 (10.0%)                        | 4 (6.9%)                                                               |
| 24 hours per day                                           | 35 (58.3%) | 37 (61.7%)                       | 32 (55.2%)                                                             |
| Missing                                                    | 5 (8.3%)   | 3 (5.0%)                         | 8 (13.8%)                                                              |
| Importance of battery life (Very important)                | 36 (60.0%) | 45 (75.0%)                       | 34 (58.6%)                                                             |
| Enjoyed using Fitbit to track step counts (Strongly agree) | 45 (75.0%) | 42 (70.0%)                       | 42 (72.4%)                                                             |
| Enjoyed participating in the study (Strongly agree)        | 45 (75.0%) | 42 (70.0%)                       | 46 (79.3%)                                                             |
| Study helped to increase physical activity level           | 30 (50.0%) | 38 (63.3%)                       | 44 (75.9%)                                                             |
