# Supplementary material for: Effect of Gamification With and Without Financial Incentives to Increase Physical Activity Among Veterans Classified as Having Obesity or Overweight: A Randomized Clinical Trial
Source: PubMed Central journal article supplement (PMC8271358; doi:10.1001/jamanetworkopen.2021.16256), 2021-07-09
Supplement: jamanetwopen-e2116256-s003.pdf [file jamanetwopen-e2116256-s003.pdf]

## Data Sharing Statement

Agarwal. Effect of Gamification With and Without Financial Incentives to Increase Physical Activity Among Veterans Classified as Having Obesity or Overweight: A Randomized Clinical Trial. *JAMA Netw Open*. Published July 09, 2021.

doi:10.1001/jamanetworkopen.2021.16256

### Data

**Data available:** No
